# Supplementary material for: Synthesis, characterization, antimicrobial, anticancer, and antituberculosis activity of some new pyrazole, isoxazole, pyrimidine and benzodiazepine derivatives containing thiochromeno and benzothiepino moieties
Source: Royal Society of Chemistry journal article supplement (doi:10.1039/c3ra42283f), 2013-01-01
Supplement: c3ra42283f.pdf [file c3ra42283f.pdf]

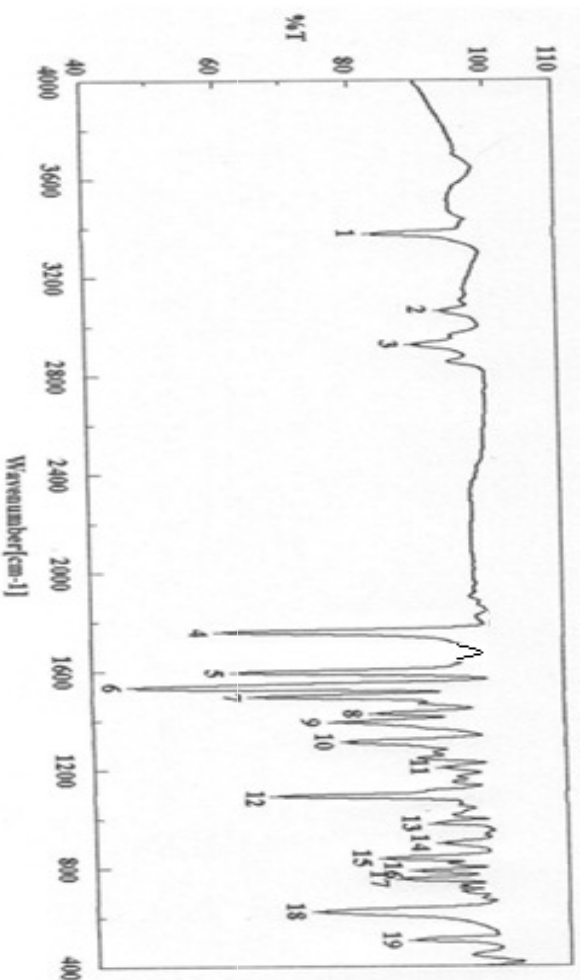

Fig. 4.1 IR (KBr) spectrum of ethyl-1,4-dihydro-1-phenylthiochromeno[4,3-c]pyrazole-3-carboxylate (3)

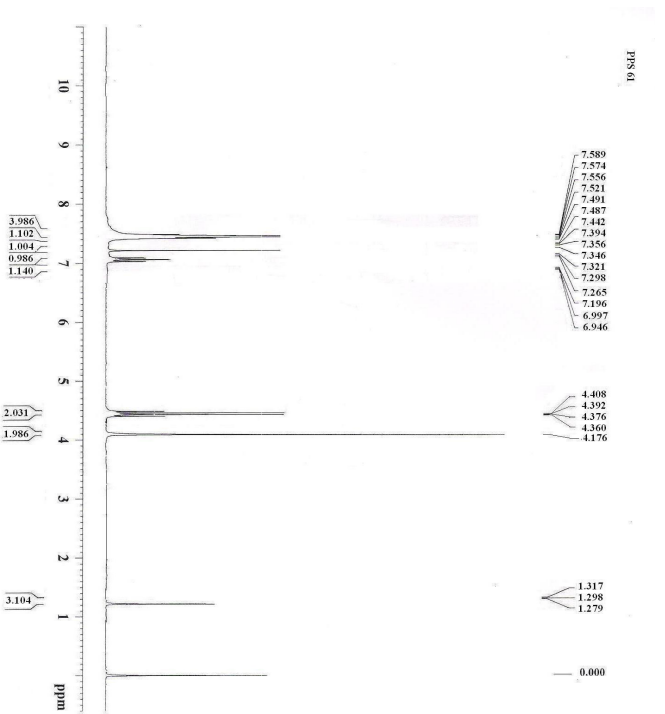

Fig. 4.2 <sup>1</sup>H-NMR (CDCl<sub>3</sub>) spectrum of ethyl-1,4-dihydro-1-phenylthiochromeno[4,3-c]pyrazole-3-carboxylate (3)

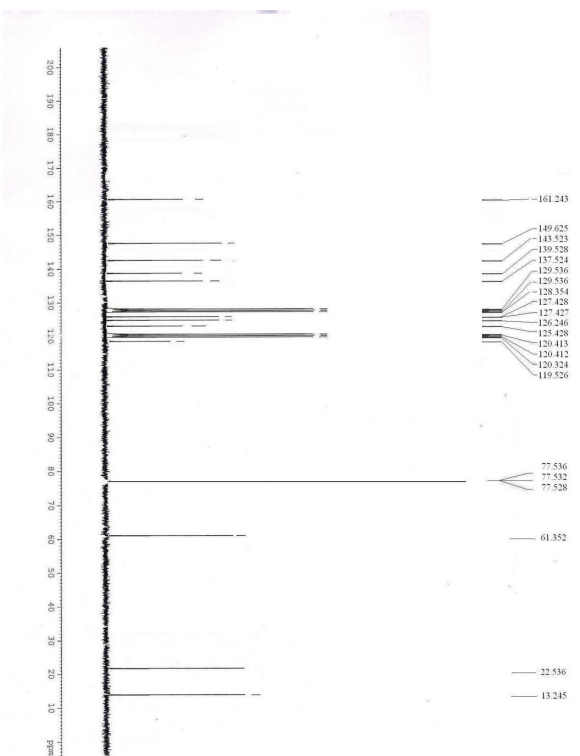

**Fig. 4.3** <sup>13</sup>C-NMR (CDCl<sub>3</sub>) spectrum of ethyl-1,4-dihydro-1-phenylthiochromeno[4,3-c]pyrazole-3-carboxylate (3)

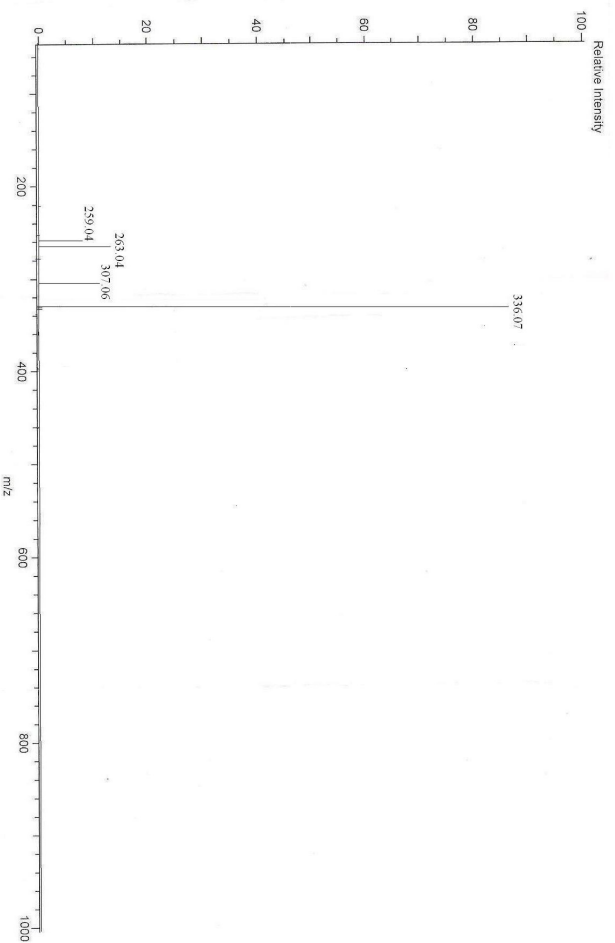

**Fig. 4.4** Mass (ESI) spectrum of ethyl-1,4-dihydro-1-phenylthiochromeno[4,3-c]pyrazole-3-carboxylate (3)

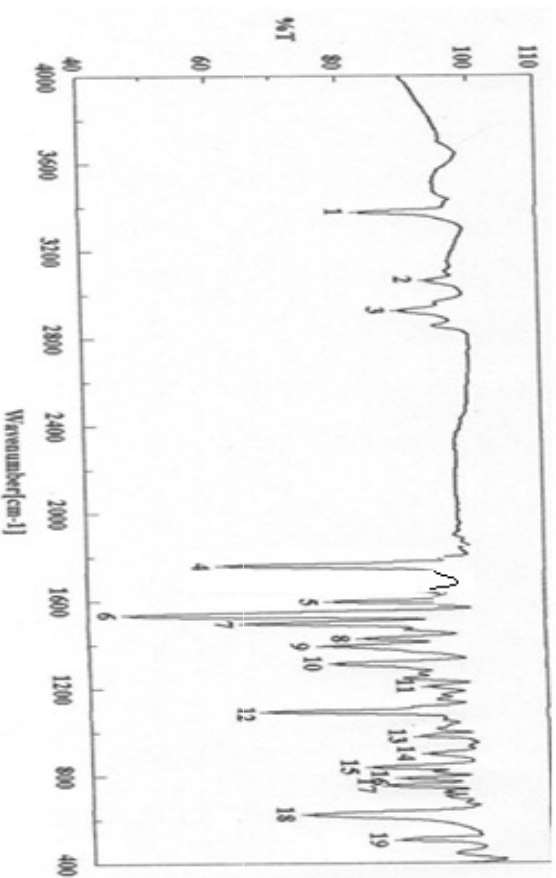

Fig. 4.5 IR spectrum (KBr) of ethyl 1,4-dihydrothiochromeno[4,3-c]pyrazole-3-carboxylate (4)

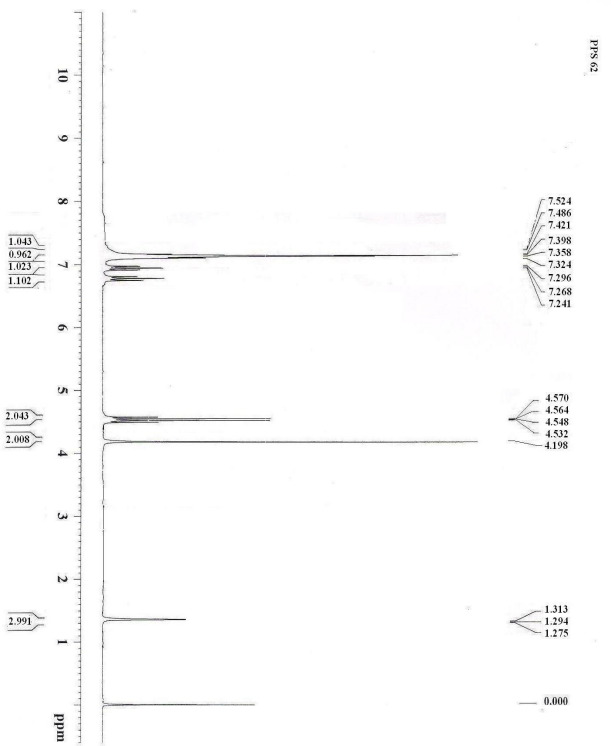

Fig. 4.6 <sup>1</sup>H-NMR (CDCl<sub>3</sub>) spectrum of ethyl 1,4-dihydrothiochromeno[4,3-c]pyrazole-3-carboxylate (4)

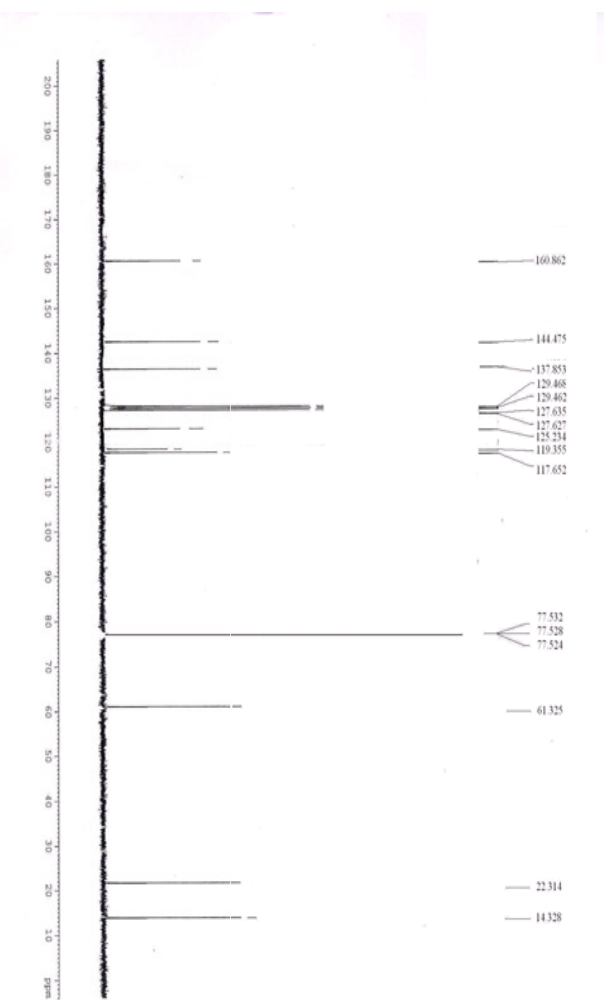

**Fig. 4.7** <sup>13</sup>C-NMR (CDCl<sub>3</sub>) spectrum of ethyl 1,4-dihydrothiochromeno[4,3-c]pyrazole-3-carboxylate (4)

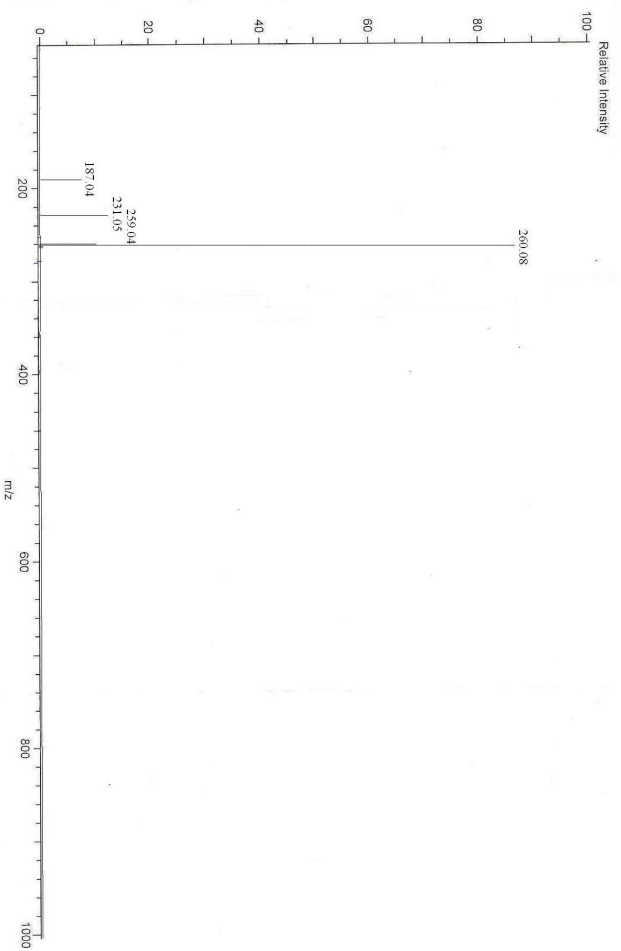

**Fig. 4.8** Mass (ESI) spectrum of ethyl 1,4-dihydrothiochromeno[4,3-c]pyrazole-3-carboxylate (4)

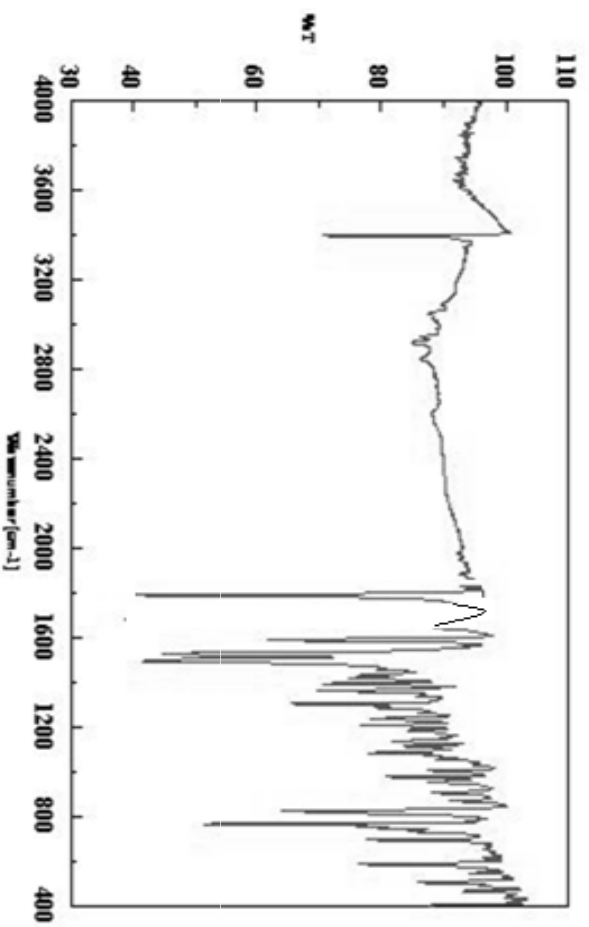

Fig. 4.9 IR (KBr) spectrum of ethyl 4H-thiochromeno[3,4-d]isoxazole-3-carboxylate (5)

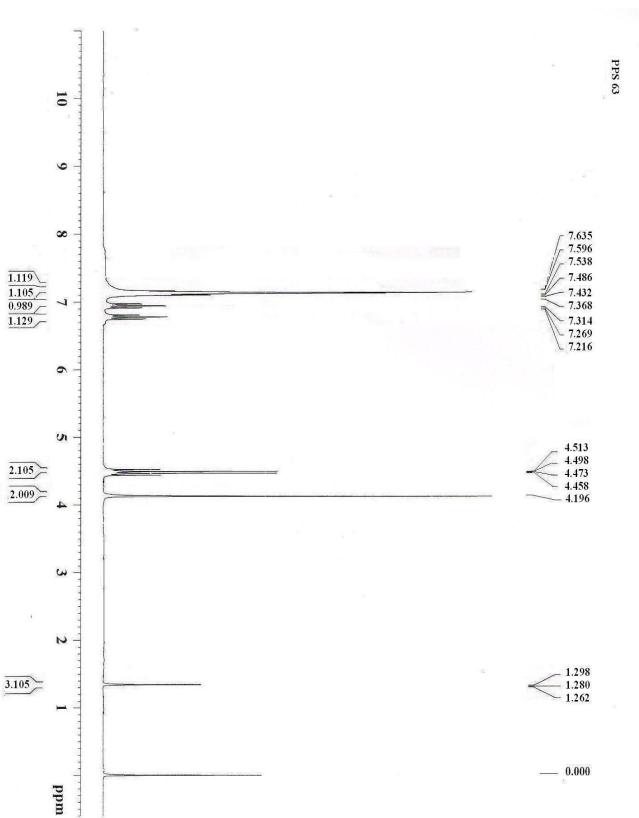

Fig. 4.10 <sup>1</sup>H-NMR (CDCl<sub>3</sub>) spectrum of ethyl 4H-thiochromeno[3,4-d]isoxazole-3-carboxylate (5)

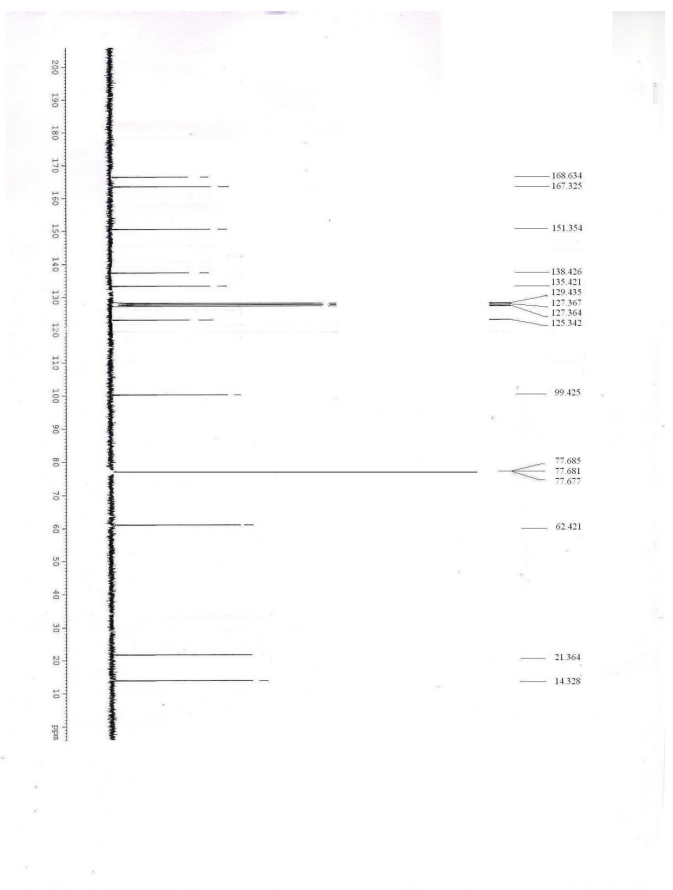

**Fig. 4.11** <sup>13</sup>C-NMR (CDCl<sub>3</sub>) spectrum of ethyl 4H-thiochromeno[3,4-d]isoxazole-3-carboxylate (5)

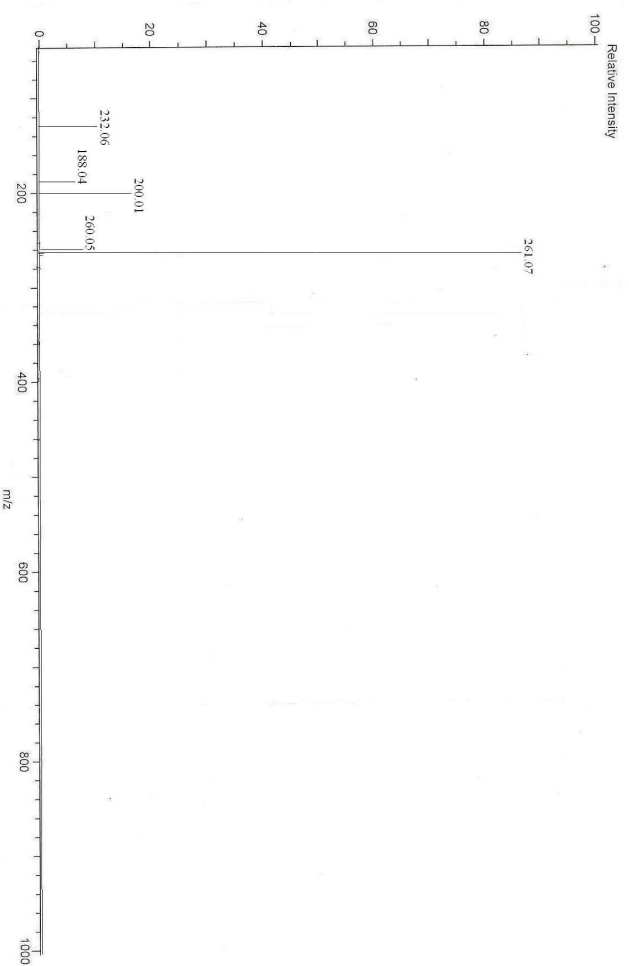

**Fig. 4.12** Mass (ESD) spectrum of ethyl 4H-thiochromeno[3,4-d]isoxazole-3-carboxylate (5)

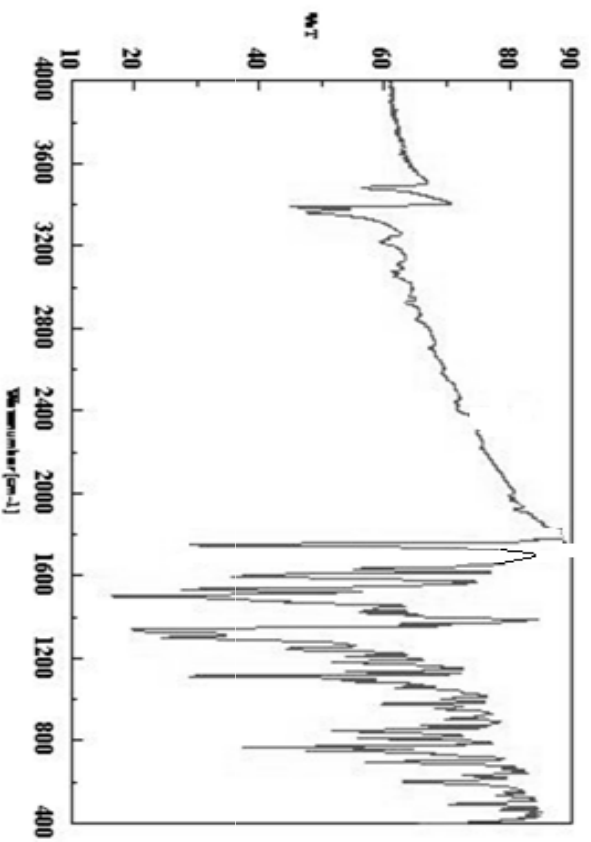

Fig. 4.13 IR (KBr) spectrum of ethyl-2,5-dihydro-2-oxo-1H-thiochromeno[4,3-d]pyrimidine-4-carboxylate (6)

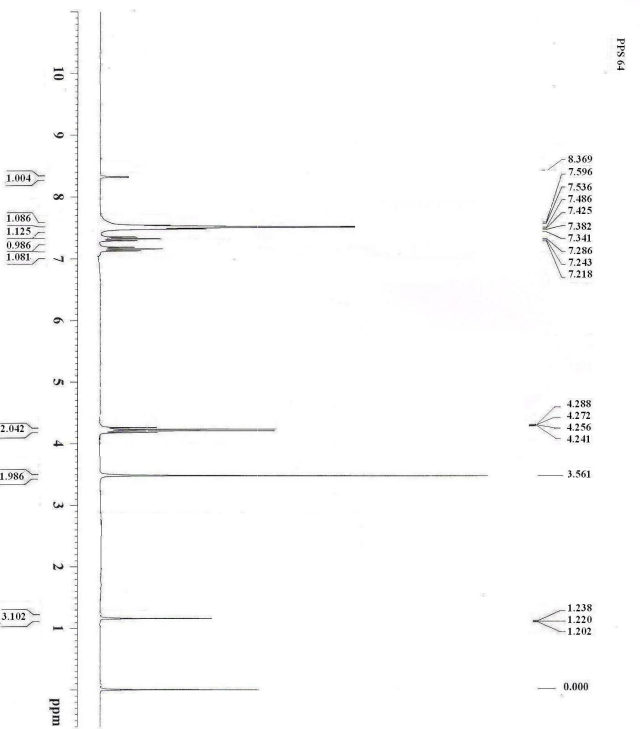

Fig. 4.14 <sup>1</sup>H-NMR (DMSO-d<sub>6</sub>) spectrum of ethyl-2,5-dihydro-2-oxo-1H-thiochromeno[4,3-d]pyrimidine-4-carboxylate (6)

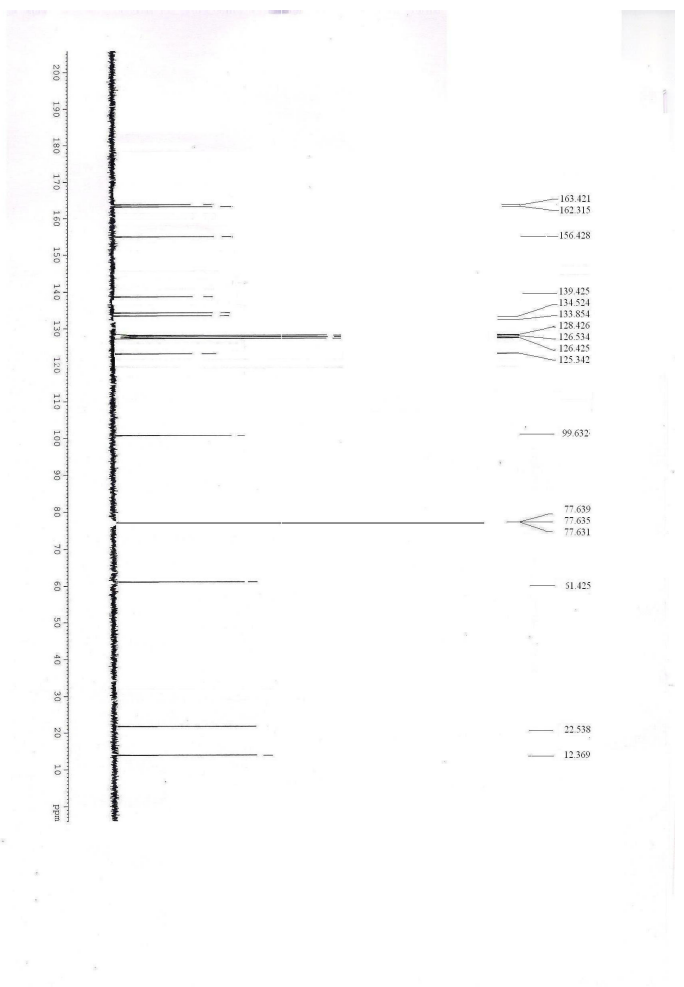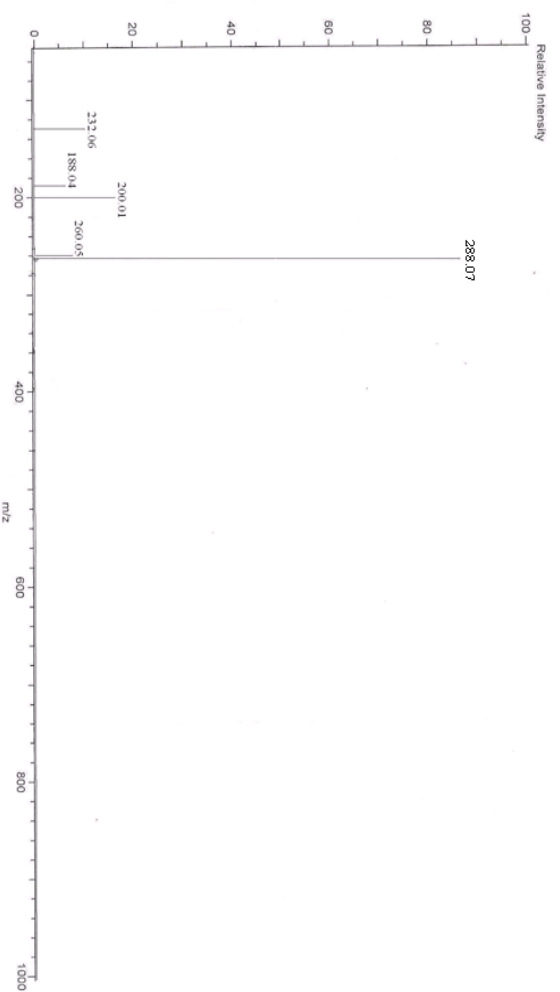



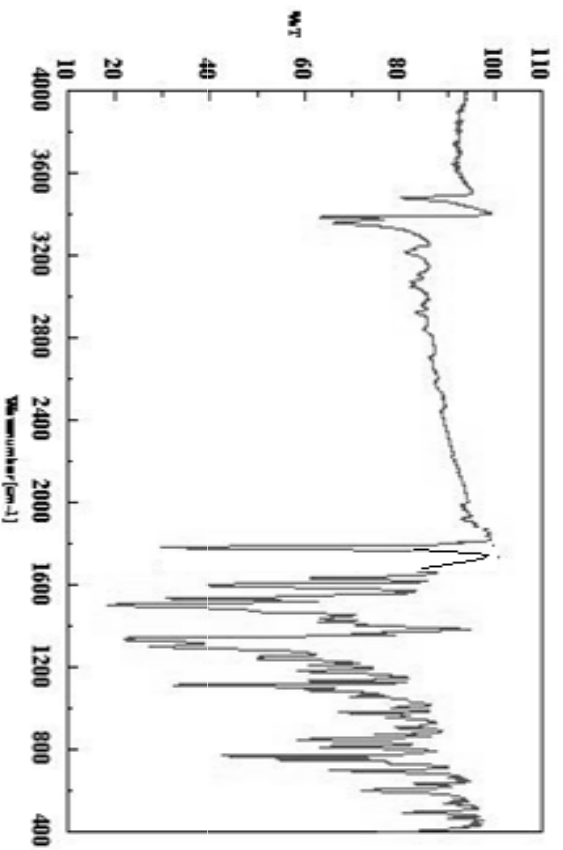

Fig. 4.17 IR (KBr) spectrum of ethyl-2,5-dihydro-2-thioxo-1H-thiochromeno[4,3-d]pyrimidine-4-carboxylate (7)

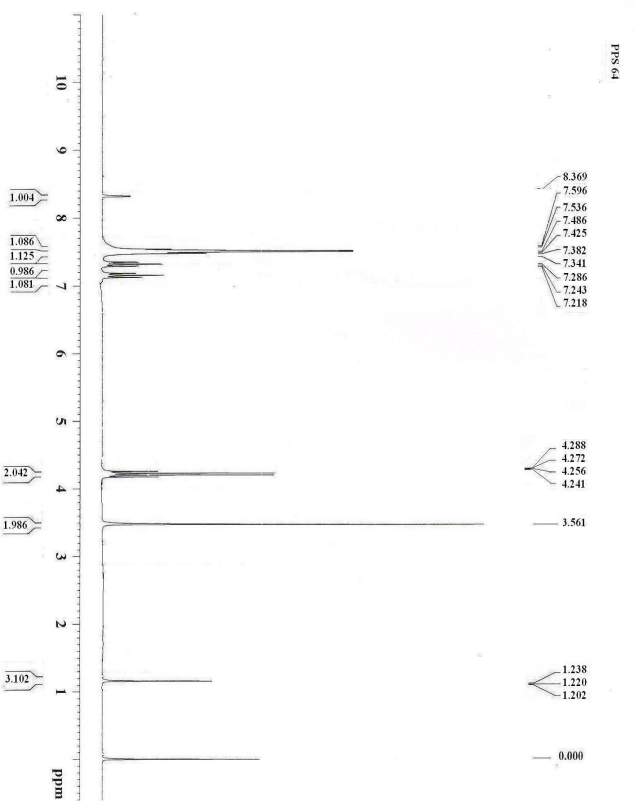

Fig. 4.18 <sup>1</sup>H-NMR (CDCl<sub>3</sub>+DMSO-d<sub>6</sub>) spectrum of ethyl-2,5-dihydro-2-thioxo-1H-thiochromeno[4,3-d]pyrimidine-4-carboxylate (7)

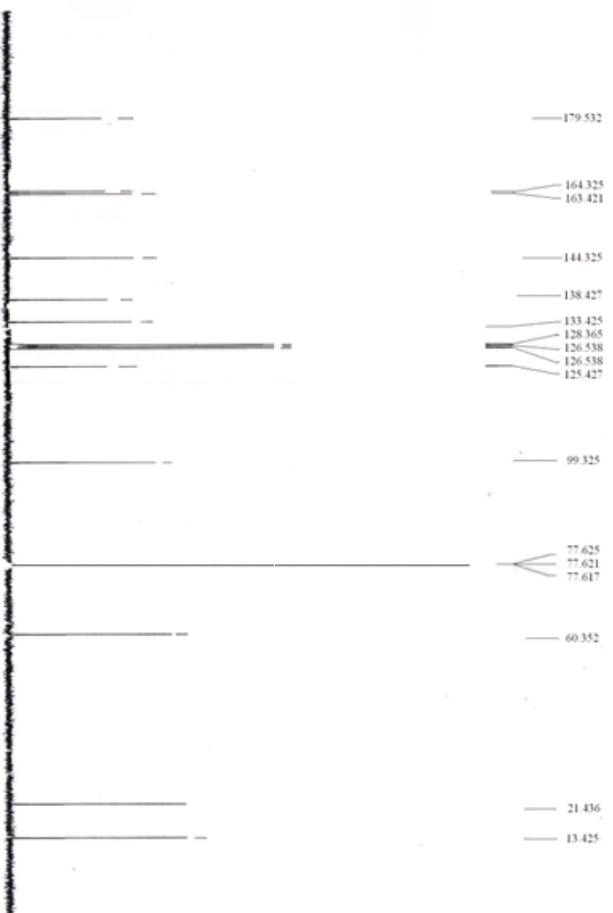

**Fig. 4.19** <sup>13</sup>C-NMR (CDCl<sub>3</sub>+DMSO-d<sub>6</sub>) spectrum of ethyl-2,5-dihydro-2-thioxo-1H-thiochromenol[4,3-thiochromenol[4,3-d]pyrimidine-4-carboxylate (7)

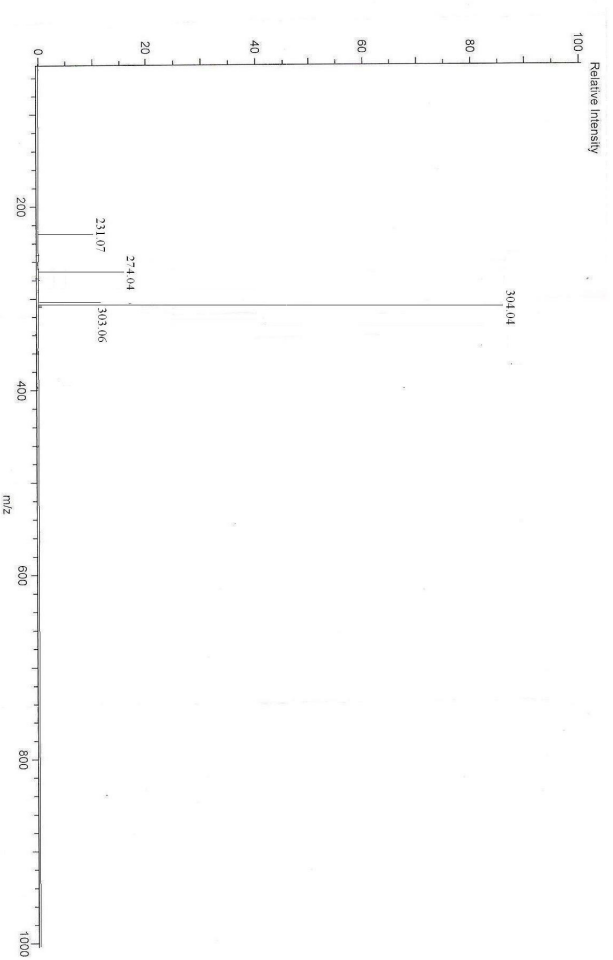

**Fig. 4.20** Mass (ESI) spectrum of ethyl-2,5-dihydro-2-thioxo-1H-thiochromenol[4,3-d]pyrimidine-4-carboxylate (7)

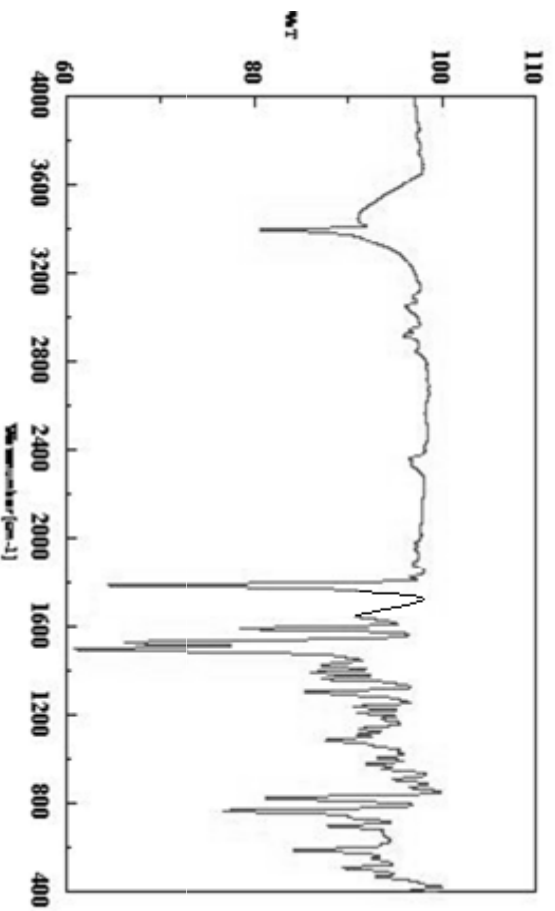

Fig. 4.21 IR (KBr) spectrum of ethyl 1,4-dihydro-1H-thiochromenol[5,4-c]benzodiazepine-4-carboxylate (8)

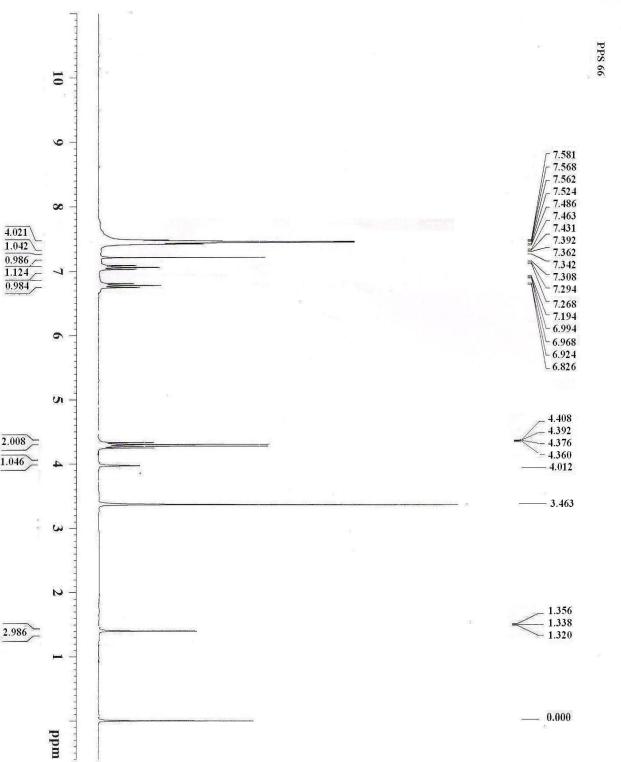

Fig. 4.23 <sup>13</sup>C-NMR (CDCl<sub>3</sub>+DMSO-d<sub>6</sub>) spectrum of ethyl 1,4-dihydro-1H-thiochromenol[5,4-c]benzodiazepine-4-carboxylate (8)

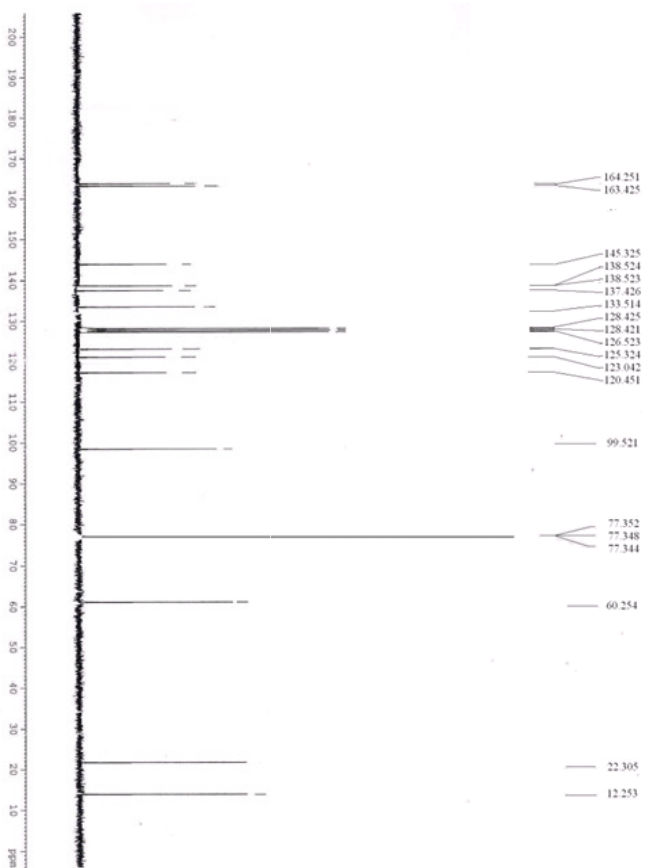

**Fig. 4.24** Mass (ESI) spectrum of ethyl 1,4-dihydro-1H-thiochromeno[5,4-c]benzodiazepine-4-carboxylate (8)

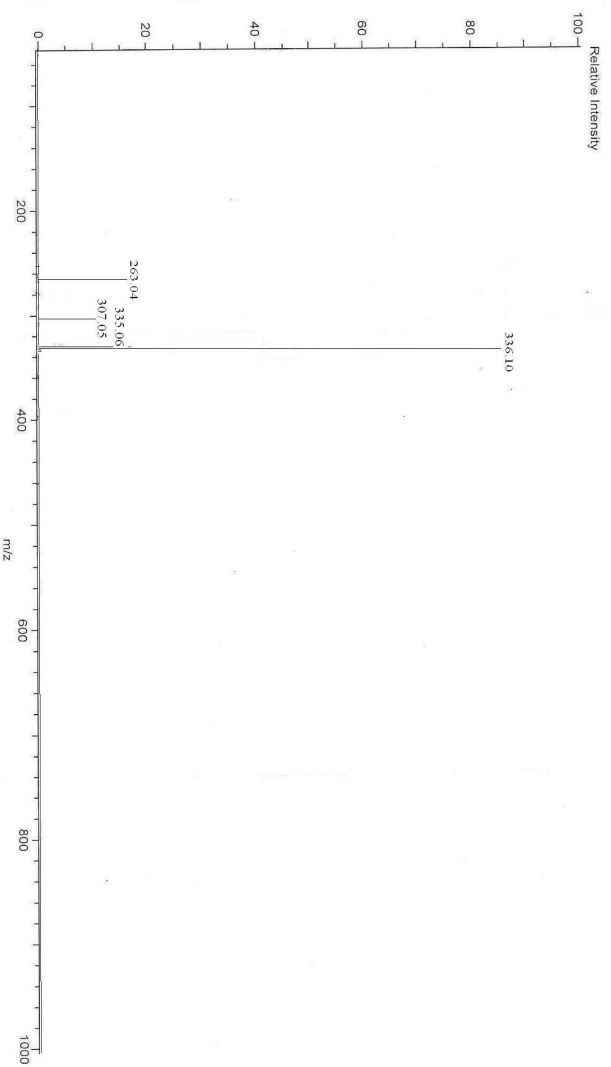

**Fig. 4.22**<sup>1</sup>H-NMR (CDCl<sub>3</sub>+DMSO-d<sub>6</sub>) spectrum of ethyl 1,4-dihydro-1H-thiochromeno[5,4-c]benzodiazepine-4-carboxylate (8)

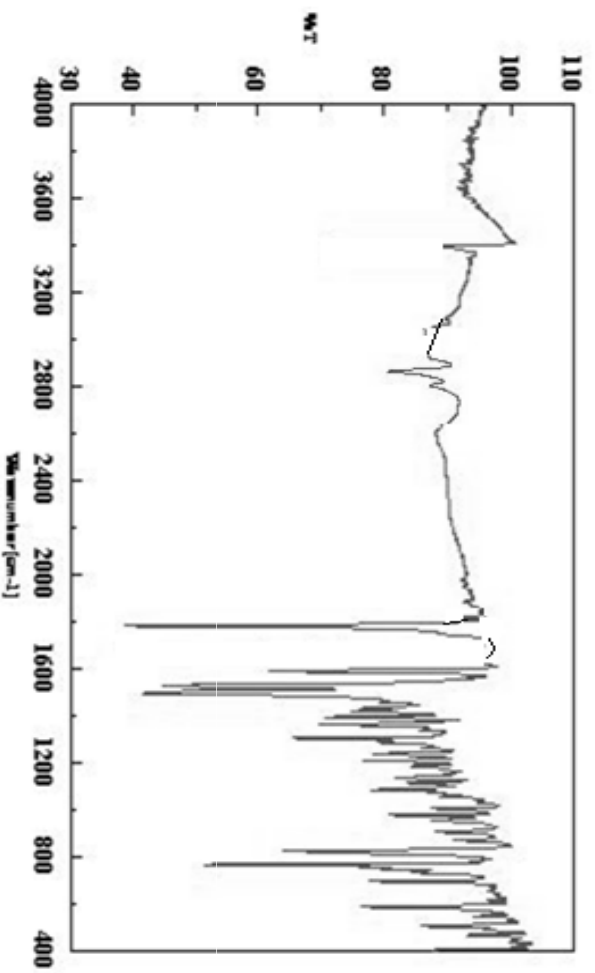

Fig. 4.25 IR (KBr) spectrum of ethyl 2,3-diphenyl-2,3-dihydro-1H-thiochromeno[5,4-c]diazepine-5-carboxylate (9)

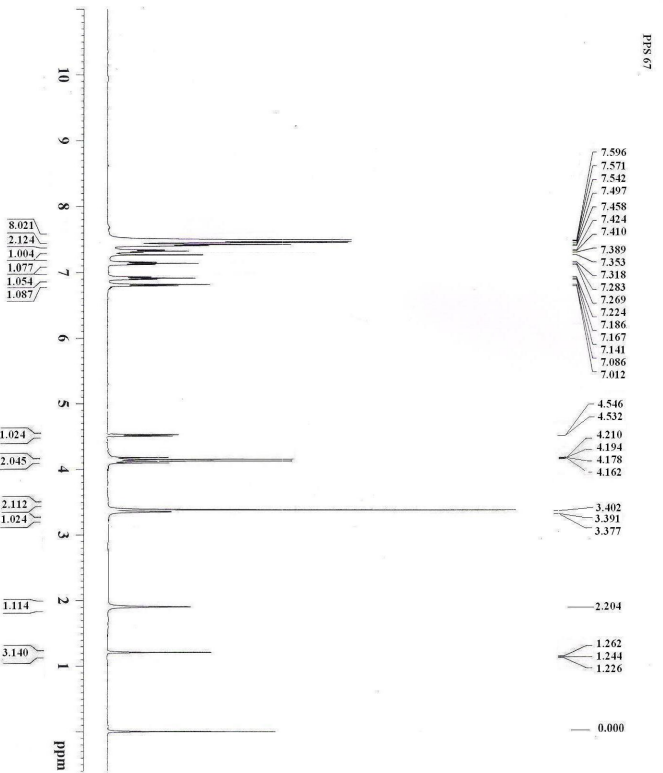

Fig. 4.26 <sup>1</sup>H-NMR (CDCl<sub>3</sub>) spectrum of ethyl 2,3-diphenyl-2,3-dihydro-1H-thiochromeno[5,4-c]diazepine-5-carboxylate (9)

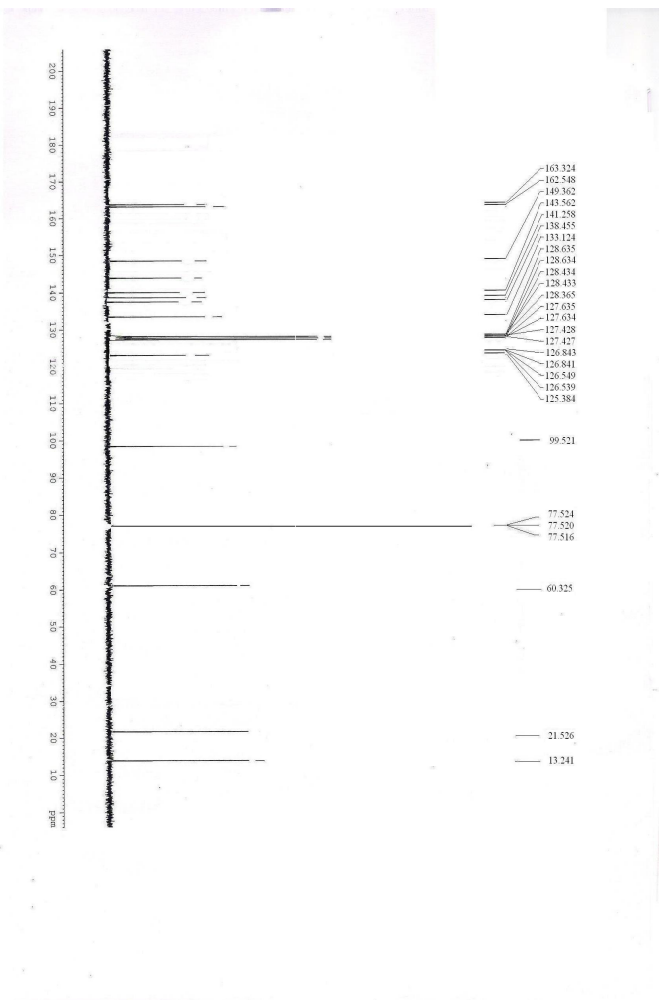

**Fig. 4.27**  $^1\text{H-NMR}$  ( $\text{DMSO-}d_6$ ) spectrum of ethyl 2,3-diphenyl-2,3-dihydro-1H-thiochromeno[5,4-thiochromeno]5,4-c[diazepine-5-carboxylate (9)

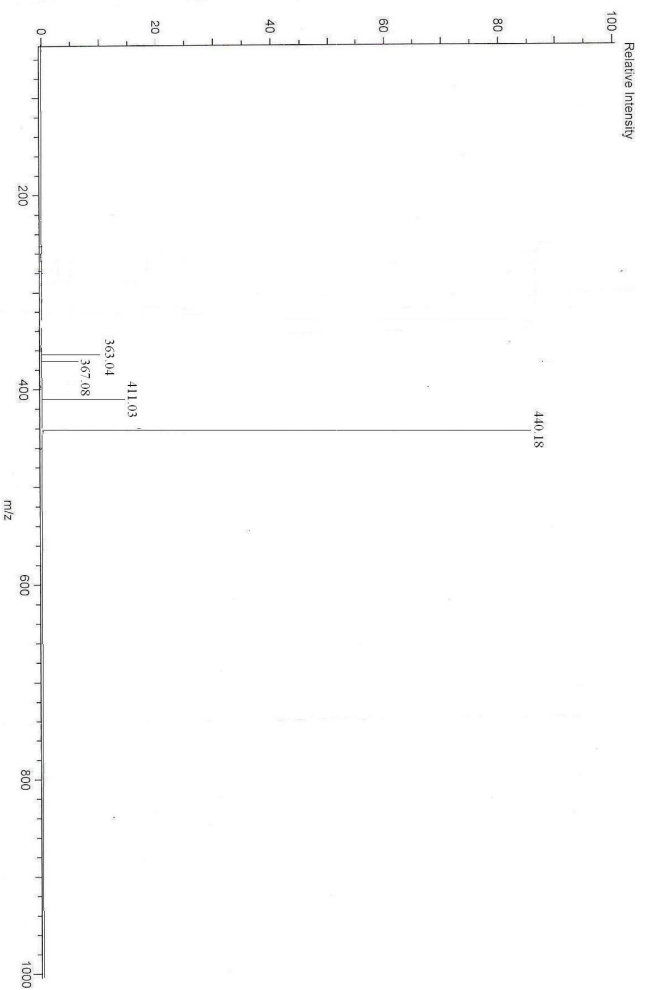

**Fig. 4.28** Mass (ESI) spectrum of ethyl 2,3-diphenyl-2,3-dihydro-1H-thiochromeno[5,4-c[diazepine-5-carboxylate (9)

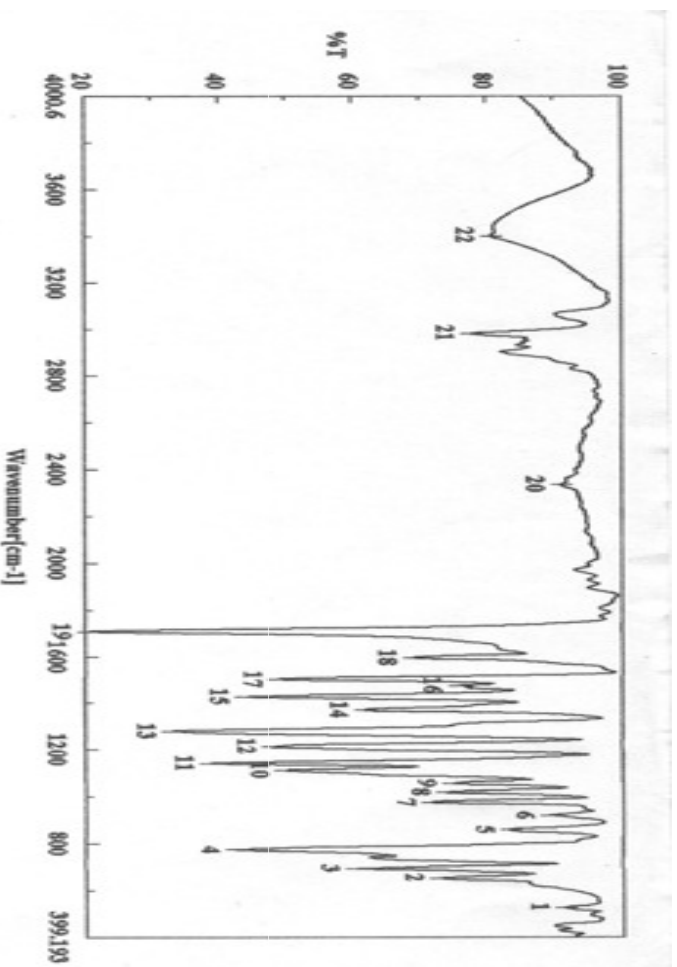

Fig. 4.29 IR (KBr) spectrum of ethyl 1-phenyl-4,5-dihydro-1H-[1]benzothiepinol[5,4-c]pyrazole-3-carboxylate (12)

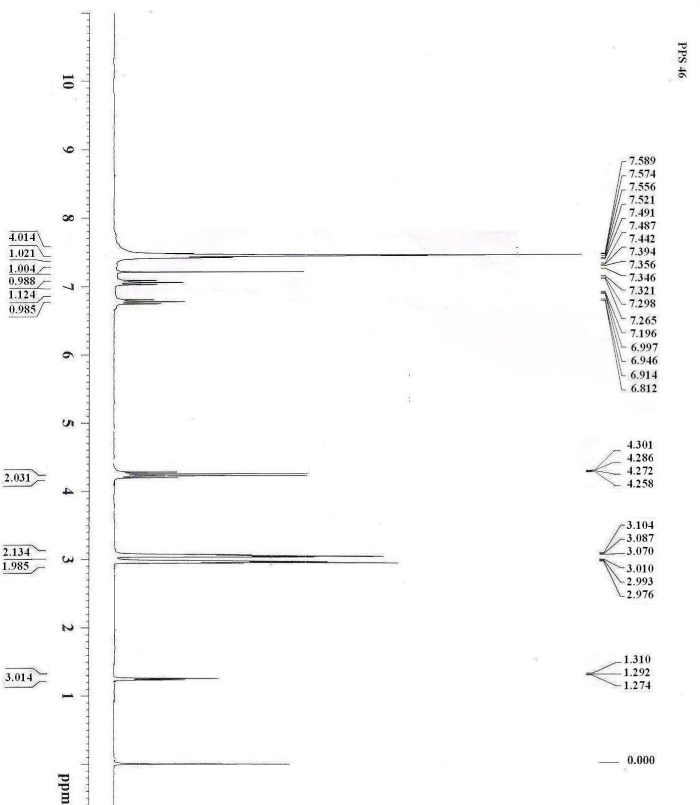

Fig. 4.30 <sup>1</sup>H-NMR (CDCl<sub>3</sub>) spectrum of ethyl 1-phenyl-4,5-dihydro-1H-[1]benzothiepinol[5,4-c]pyrazole-3-carboxylate (12)

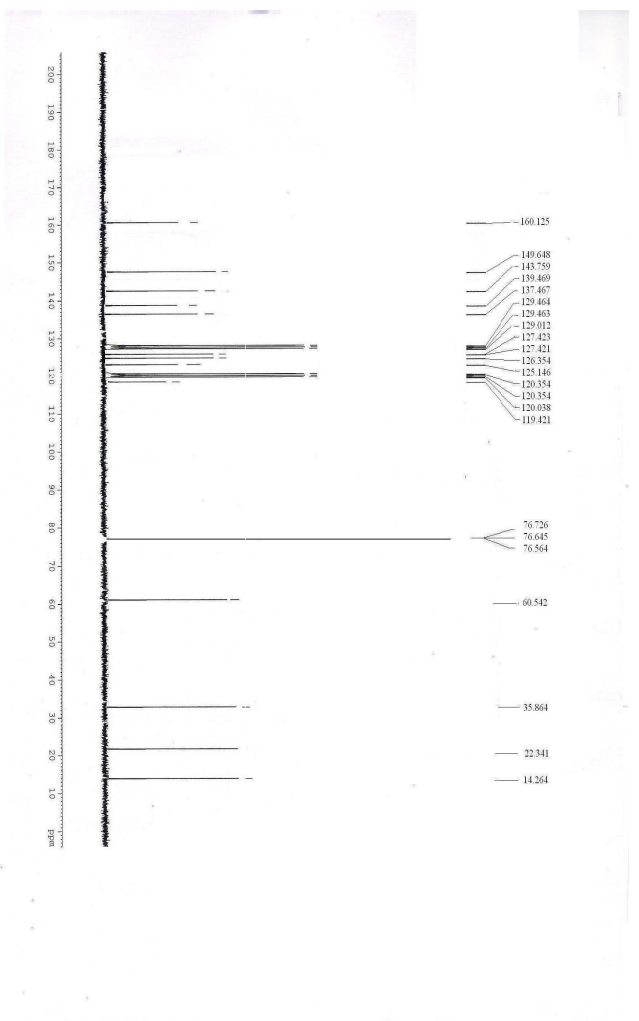

**Fig. 4.31** <sup>13</sup>C-NMR spectrum(CDCl<sub>3</sub>) of ethyl 1-phenyl-4,5-dihydro-1H-[1]benzothiepinol[5,4-c]pyrazole-3-carboxylate (12)

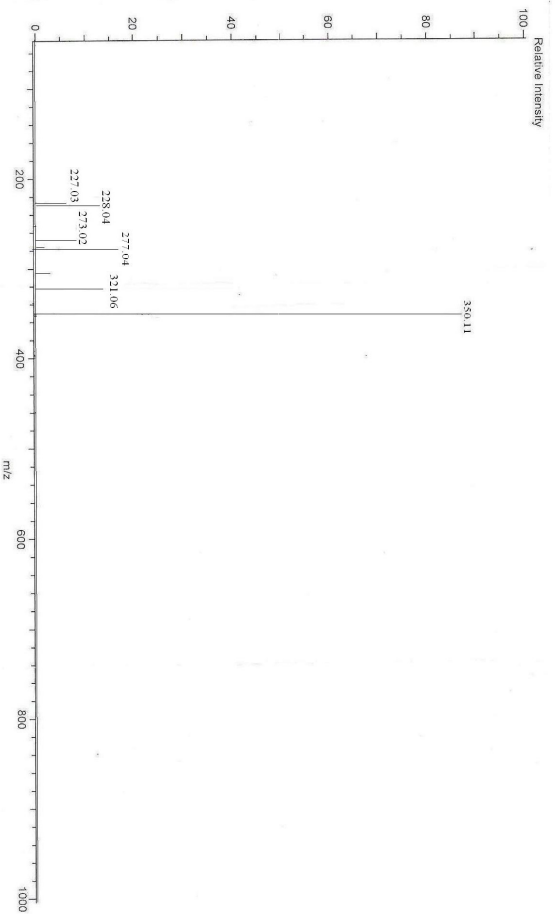

**Fig. 4.32** Mass (ESI) spectrum of ethyl 1-phenyl-4,5-dihydro-1H-[1]benzothiepinol[5,4-c]pyrazole-3-carboxylate (12)



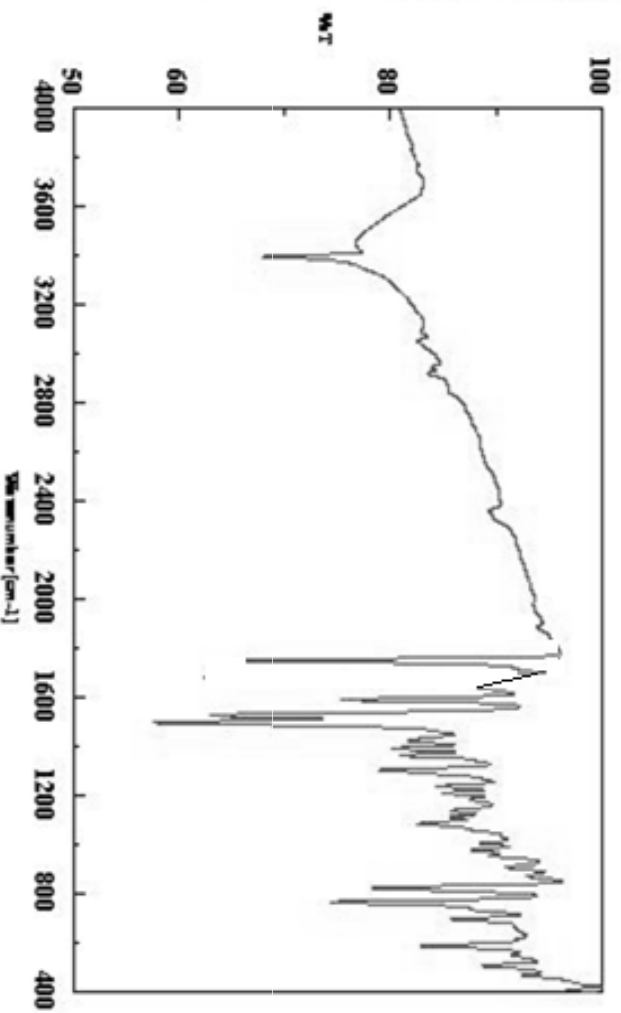

Fig. 4.33 IR (KBr) spectrum of ethyl 4,5-dihydro-1H-[1]benzothiepinol[5,4-c]pyrazole-3-carboxylate (13)

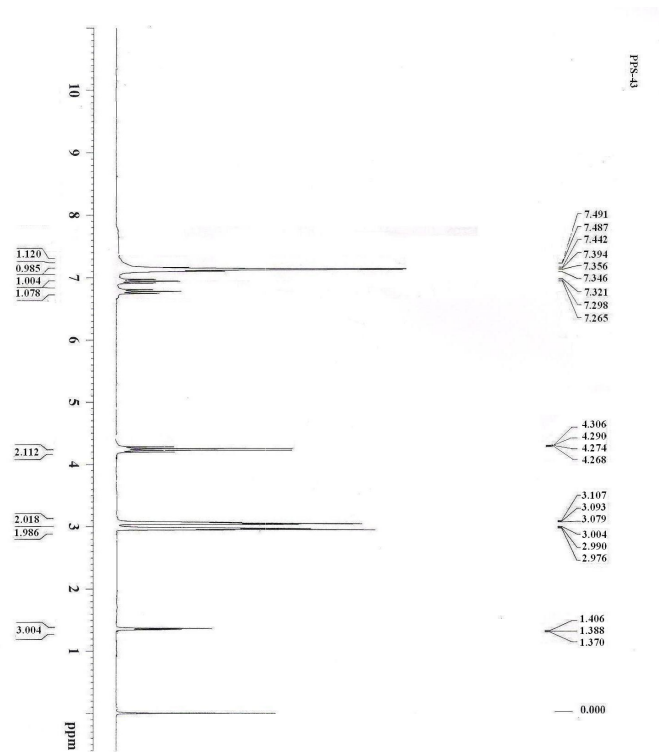

Fig. 4.34 <sup>1</sup>H-NMR (CDCl<sub>3</sub>) spectrum of ethyl 4,5-dihydro-1H-[1]benzothiepinol[5,4-c]pyrazole-3-carboxylate (13)

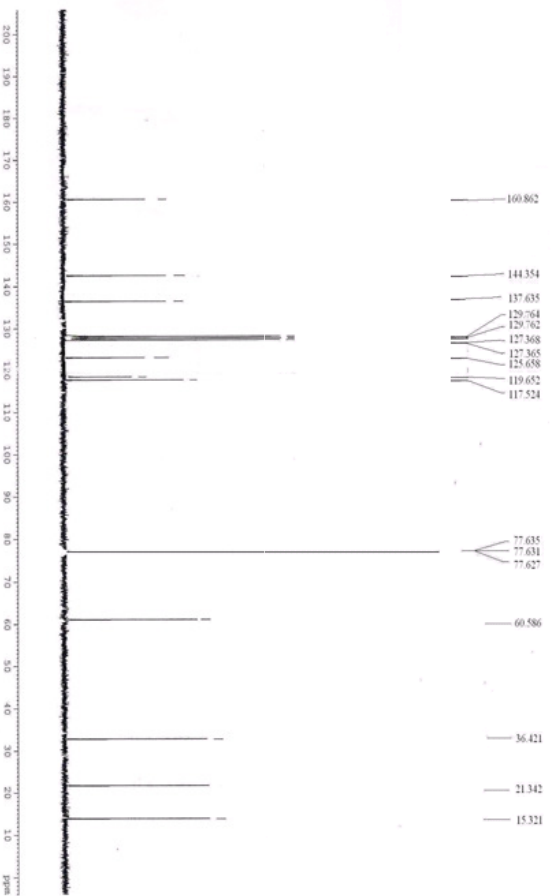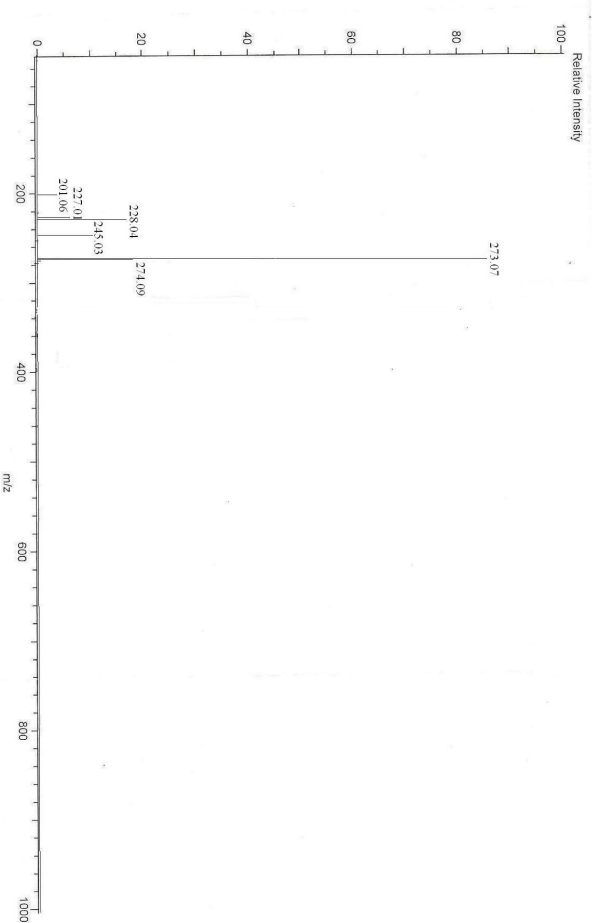

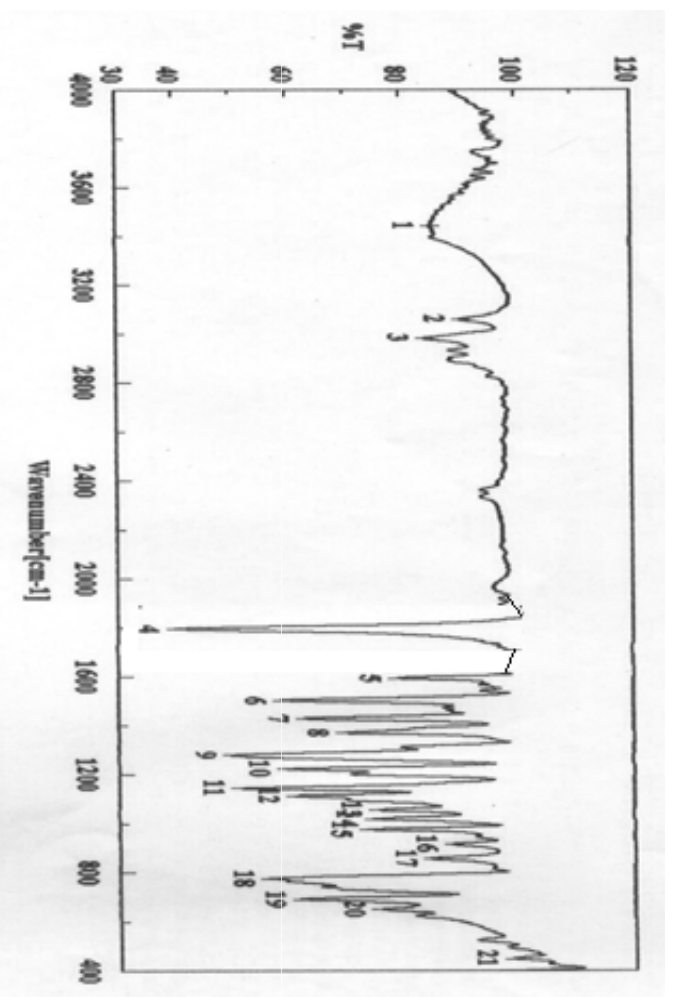

Fig. 4.37 IR (KBr) spectrum of ethyl 4,5-dihydro[1]benzothiepinol[4,5-d]isoxazole-3-carboxylate (14)

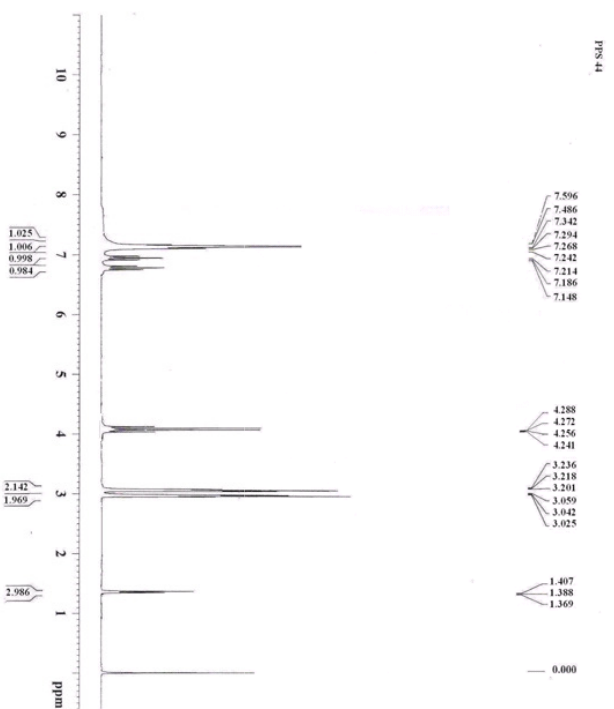

Fig. 4.38 <sup>1</sup>H-NMR (CDCl<sub>3</sub>) spectrum of ethyl 4,5-dihydro[1]benzothiepinol[4,5-d]isoxazole-3-carboxylate (14)

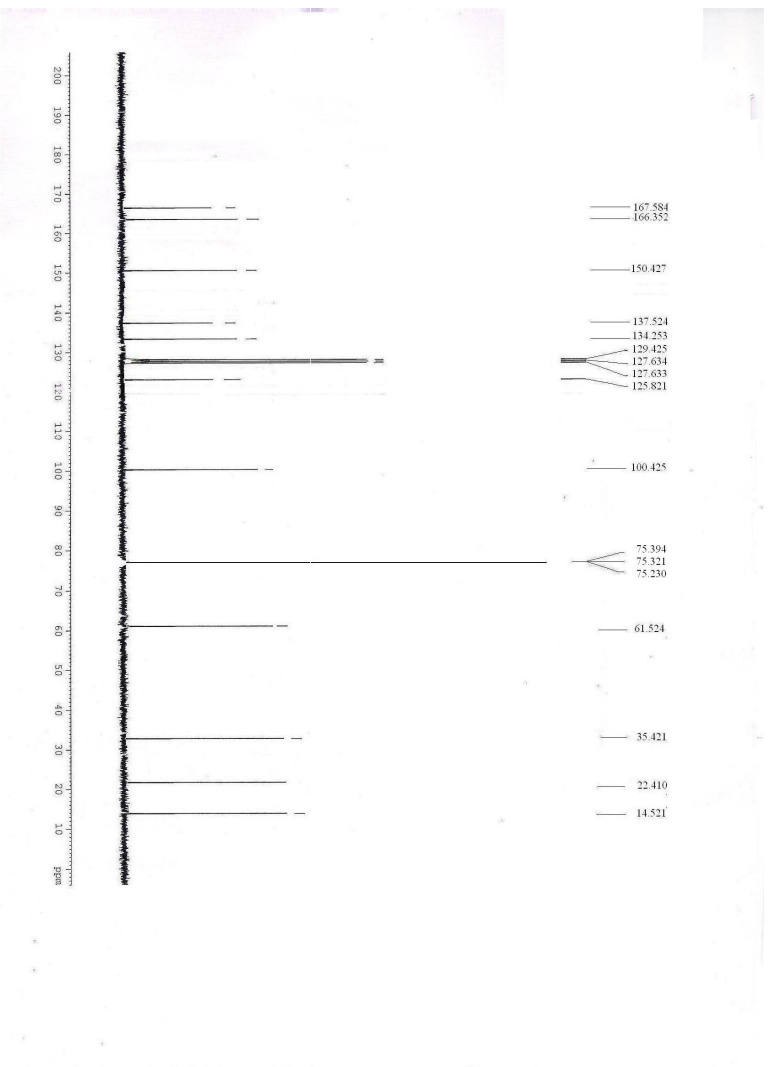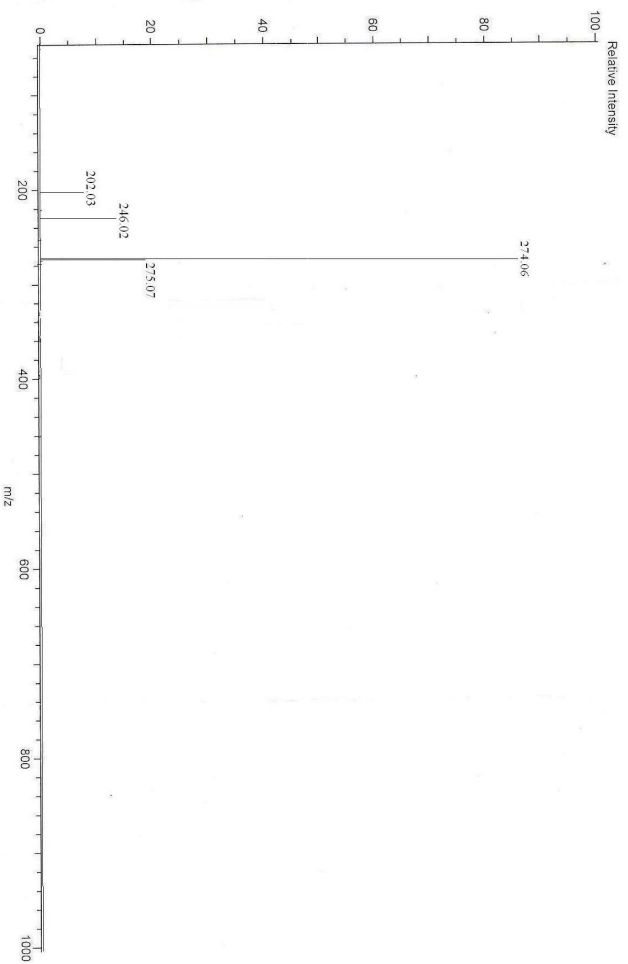

**Fig. 4.40** Mass (ESI) spectrum of ethyl 4,5-dihydro[1]benzothiepinol[4,5-d]isoxazole-3-carboxylate (14)

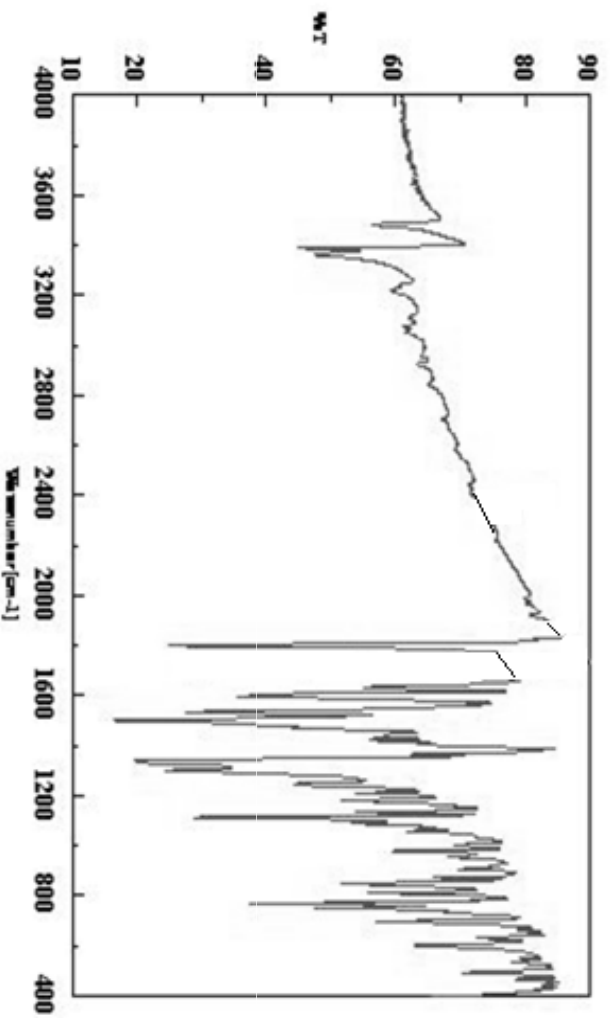

Fig. 4.41 IR (KBr) spectrum of ethyl 2-oxo-1,2,5,6-tetrahydro[1]benzothiepinol[5,4-d]pyrimidine-4-carboxylate (15)

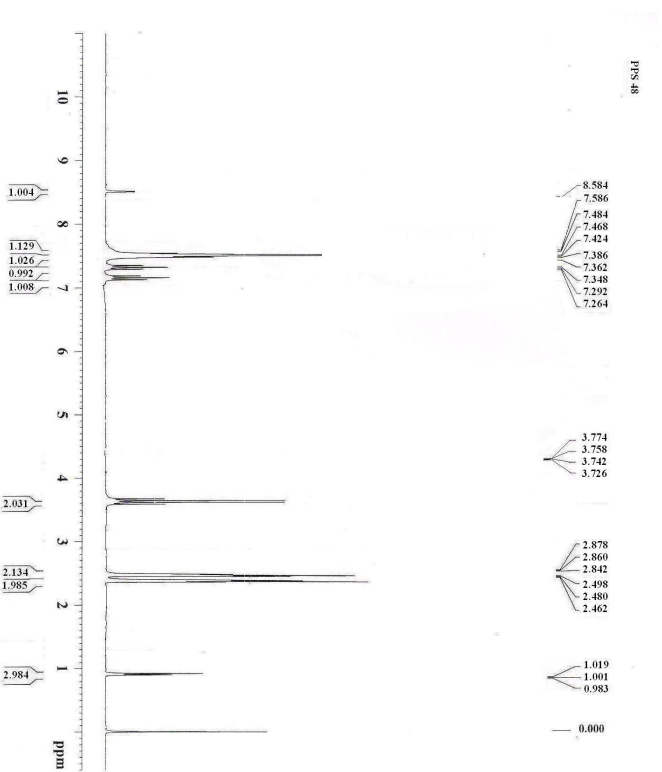

Fig. 4.42 <sup>1</sup>H-NMR (DMSO-d<sub>6</sub>) spectrum of ethyl 2-oxo-1,2,5,6-tetrahydro[1]benzothiepinol[5,4-d]pyrimidine-4-carboxylate (15)

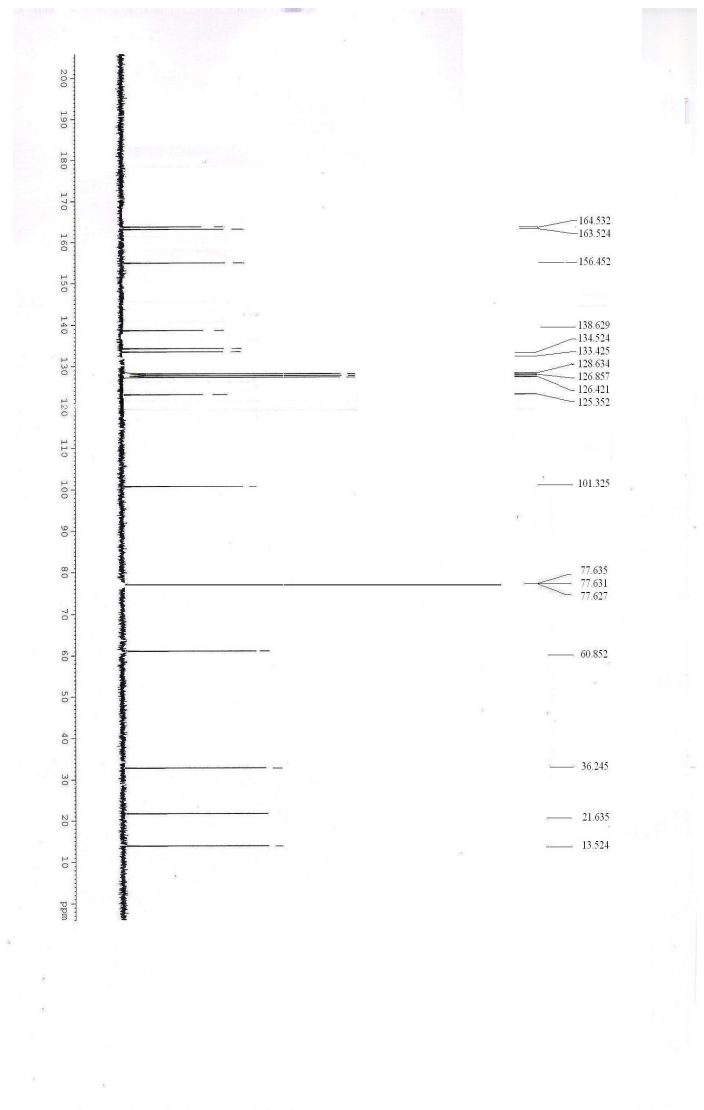

Fig. 4.4313C-NMR (DMSO-d6) spectrum of ethyl-2-oxo-1,2,5,6-tetrahydro[1]benzothiepinol[5,4-tetrahydro]pyrimidine-4-carboxylate (15)

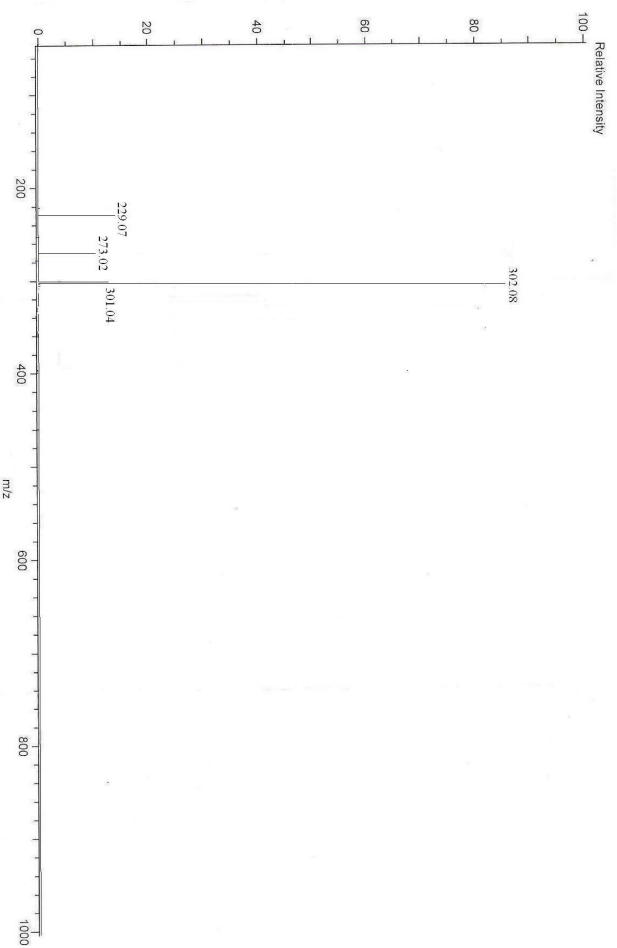

Fig. 4.44 Mass (ESI) spectrum of ethyl-2-oxo-1,2,5,6-tetrahydro[1]benzothiepinol[5,4-dipyrimidine-4-carboxylate (15)

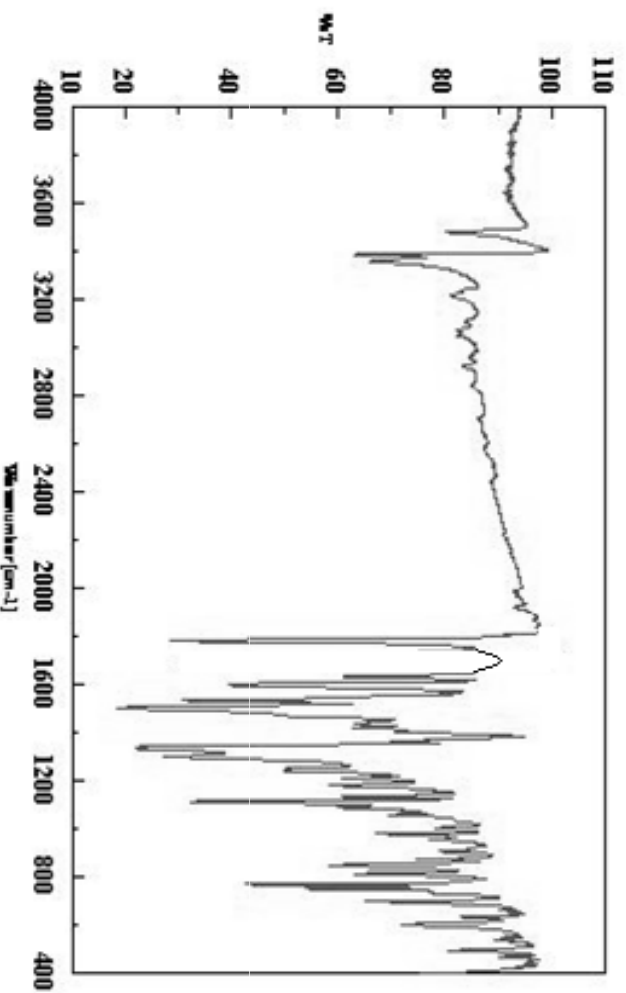

Fig. 4.45 IR (KBr) spectrum of ethyl 2-thioxo-1,2,5,6-tetrahydro[1]benzothiepinol[5,4-d]pyrimidine-4-carboxylate (16)

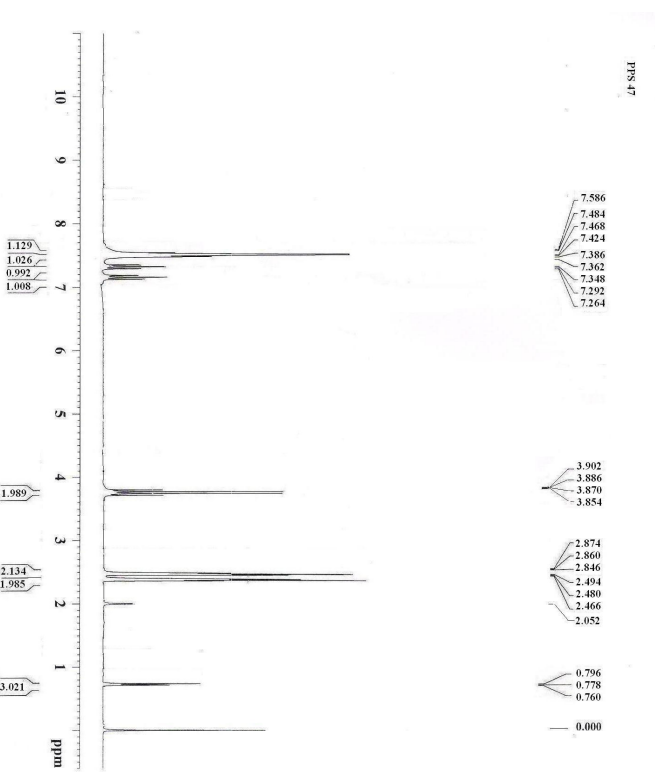

Fig. 4.46 <sup>1</sup>H-NMR (CDCl<sub>3</sub>, DMSO-d<sub>6</sub>) spectrum of Ethyl 2-thioxo-1,2,5,6-tetrahydro[1]benzothiepinol[5,4-d]pyrimidine-4-carboxylate (16)





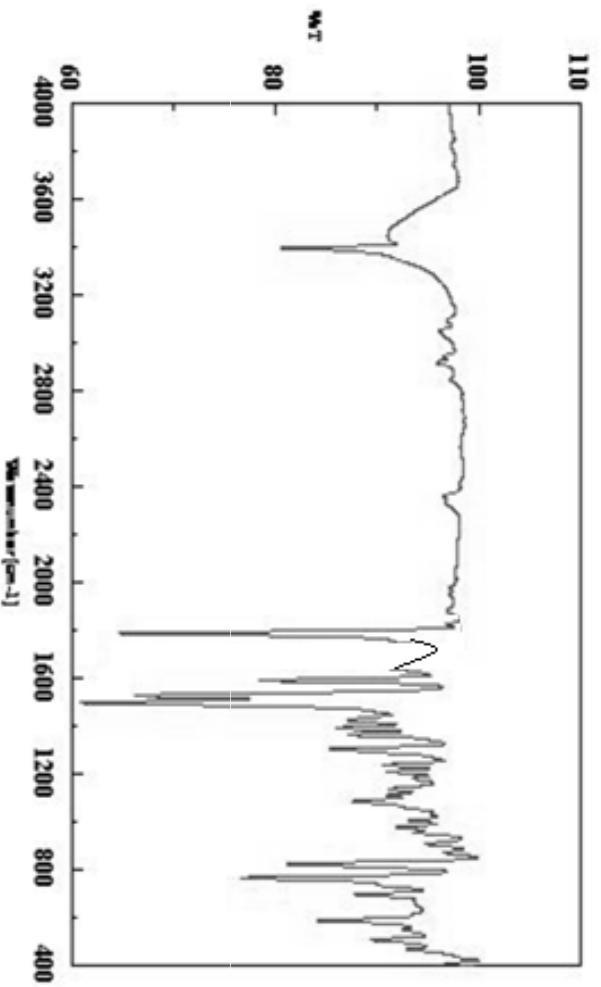

Fig. 4.49 IR (KBr) spectrum of ethyl 1,4-dihydro-1H-benzothiepine [5,4-c] benzodiazepine-4-carboxylate (17)

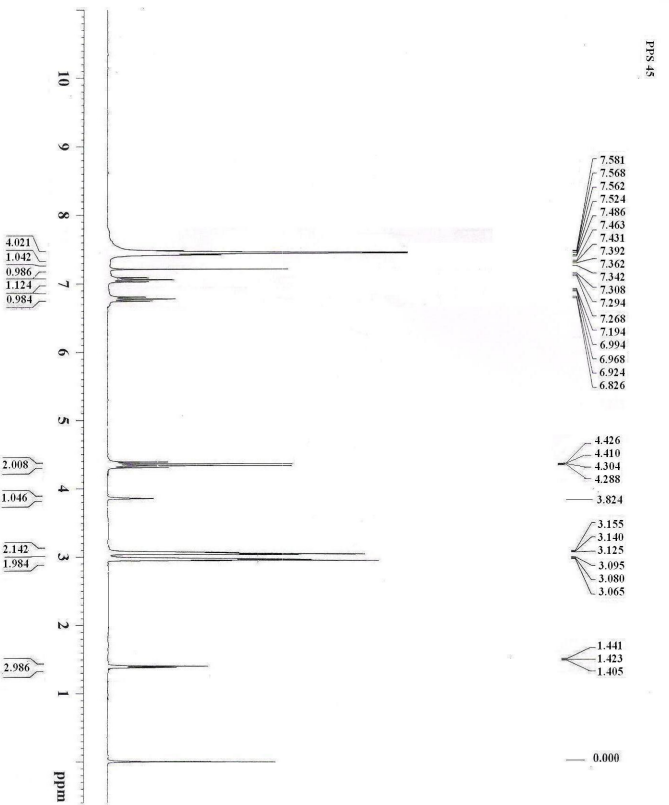

Fig. 4.50 <sup>1</sup>H-NMR (DMSO-d<sub>6</sub>) spectrum of ethyl 1,4-dihydro-1H-benzothiepine [5,4-c] benzodiazepine-4-carboxylate (17)

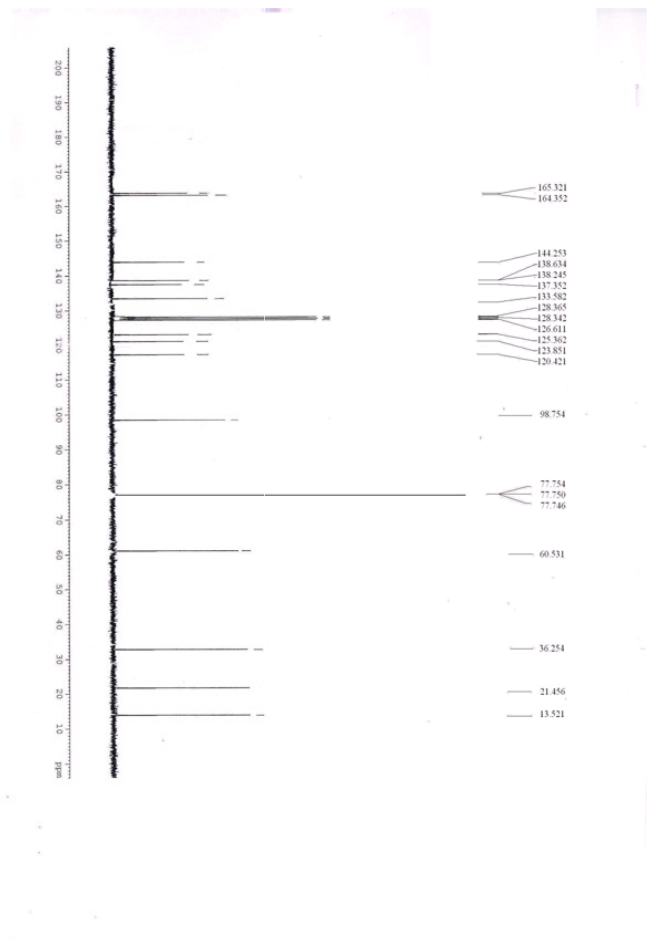

**Fig. 4.51**  $^{13}\text{C}$ -NMR (DMSO- $d_6$ ) spectrum of ethyl 1,4-dihydro-1H-benzothiepine [5,4-c] benzodiazepine-4-carboxylate (17)

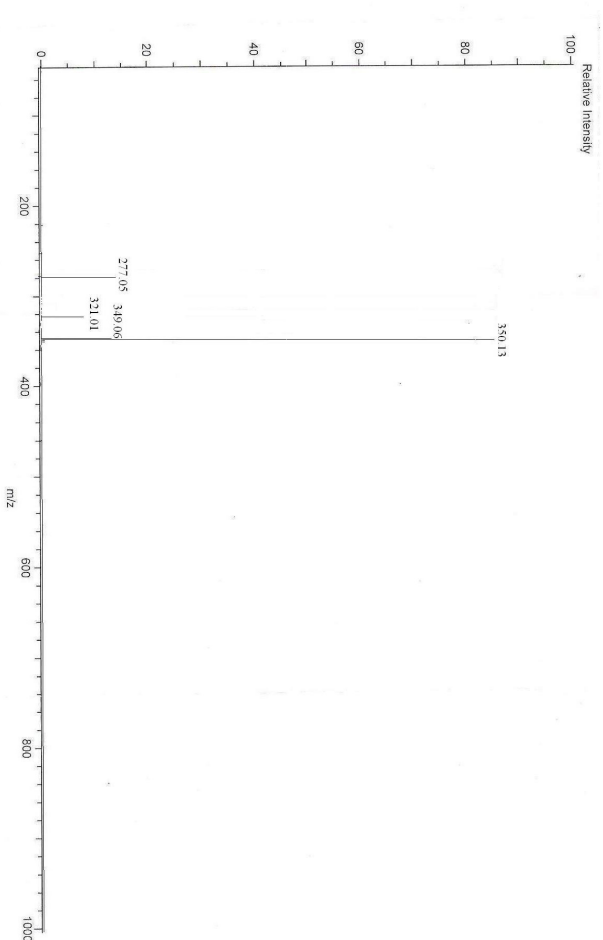

**Fig. 4.52** Mass (ESI) spectrum of ethyl 1,4-dihydro-1H-benzothiepine [5,4-c] benzodiazepine-4-carboxylate (17)

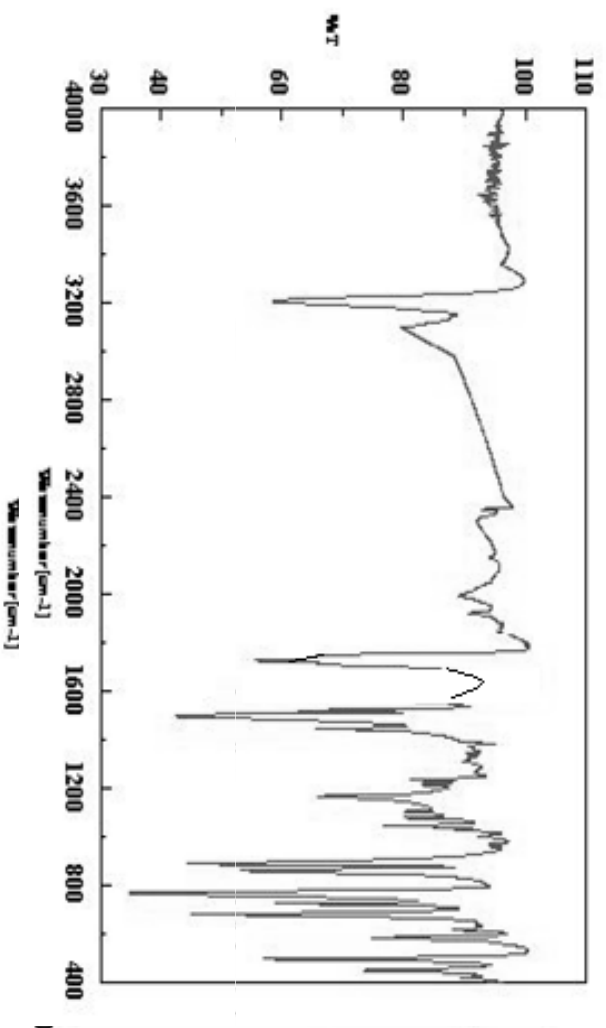

Fig. 4.53 IR (KBr) spectrum of ethyl 2,3-diphenyl-2,3-dihydro-1H-benzothiepine [5,4-c]diazepine-5-carboxylate (18)

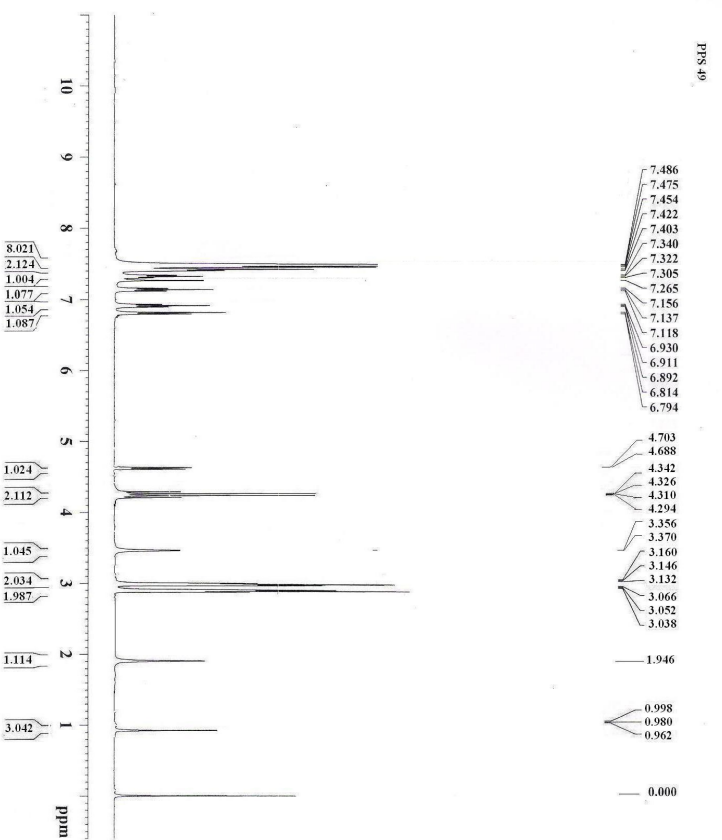

Fig. 4.54 1H-NMR (DMSO-d6) spectrum of ethyl 2,3-diphenyl-2,3-dihydro-1H-benzothiepine [5,4-c]diazepine-5-carboxylate (18)

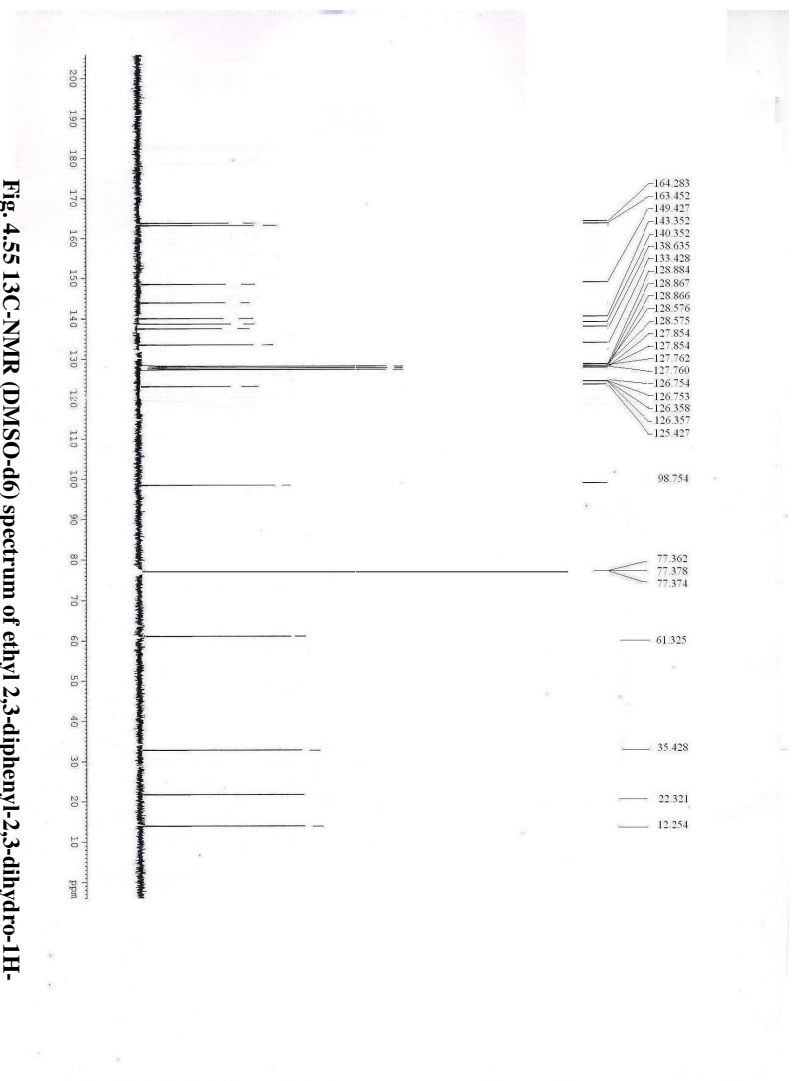

**Fig. 4.55**  $^{13}\text{C}$ -NMR (DMSO- $d_6$ ) spectrum of ethyl 2,3-diphenyl-2,3-dihydro-1H-benzothiepine [5,4-benzothiepine] [5,4-c]diazepine-5-carboxylate (18)

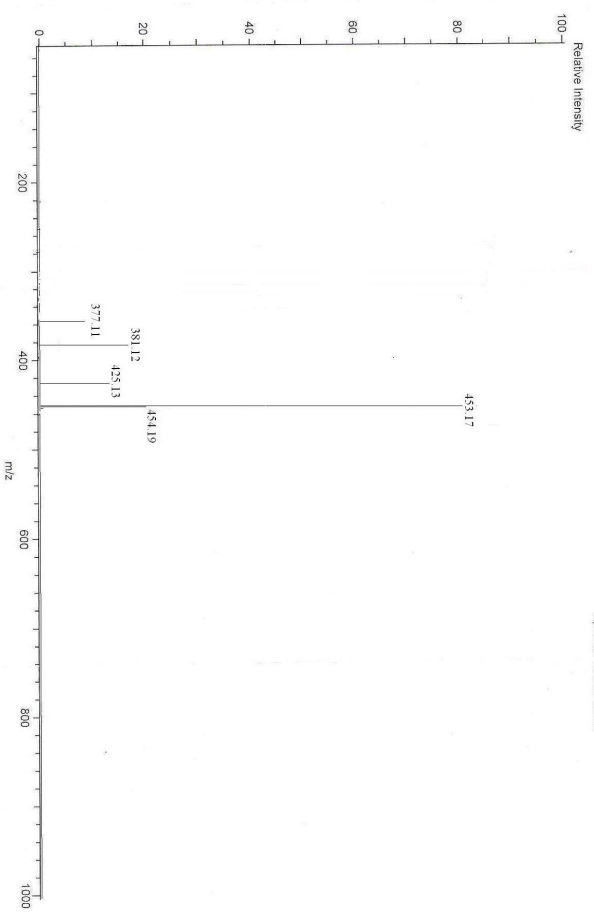

**Fig. 4.56** Mass (ESI) spectrum of ethyl 2,3-diphenyl-2,3-dihydro-1H-benzothiepine [5,4-c]diazepine-5-carboxylate (18)
